# Supplementary material for: Paul J. Crutzen – a pioneer in Earth system science and a founding member of the journal “Atmospheric Chemistry and Physics”
Source: Copernicus journal article supplement (doi:10.5194/egusphere-2023-1467), 2023-07-05
Supplement: Supplementary file [file egusphere-2023-1467-AC1-supplement.pdf]

## Reply to Alan Robock

We thank Alan Robock very much for his review – this is very helpful. His comments in the reply are in *italics* and the reply by the authors are in roman font. We reply to the comments on Paul Crutzen’s work and on ACP in detail below and also explain the changes made to the manuscript in response.

*This is a great paper and certainly should be published. But Paul’s role in nuclear winter is incorrect, and he only contributed to one proposed climate intervention scheme, injecting SO<sub>2</sub> into the stratosphere to create an aerosol cloud, not to geoengineering in general. And we now use climate intervention and not “geoengineering” to refer to this topic, and Paul’s paper used “climate intervention” in the title.*

We agree that this article should accurately portray Paul’s role in establishing the concepts of “nuclear winter” and “climate intervention”. In response we have altered the manuscript, added some discussion and included more references.

A related change to our manuscript, not directly suggested in the comment is that we now mention in the paper that the “Future of Life Institute” has presented John Birks, Paul Crutzen, Jeannie Peterson, Alan Robock, Carl Sagan, Georgiy Stenchikov, Brian Toon and Richard Turco with the 2022 “Future of Life Award” for reducing the risk of nuclear war by developing and popularising the science of nuclear winter.

*Also, all the praise for ACP needs to be tempered with a big problem it created, that of Discussions papers that are not peer-reviewed, but have DOIs and end up being referenced. Please see below for details and also respond to the 8 comments in the attached manuscript.*

This comment is discussed in detail below.

### “Nuclear winter” and “geoengineering”

*It is not correct that Paul Crutzen “pioneered the concept now known as ‘nuclear winter’.” But his work on smoke from fires after nuclear war (Crutzen and Birks, 1982) did lead directly to the theory of nuclear winter calculated by other scientists (Turco et al., 1983; Aleksandrov and Stenchikov, 1983; Robock, 1984; Covey et al., 1984). While Crutzen and Birks (1982) pointed out that there would be fires after nuclear war which would produce so much smoke that it would be dim at Earth’s surface, hence the title “Twilight at Noon”, that paper never mentioned how surface temperature would change. As John Birks told me last year, they studied tropospheric smoke, not stratospheric, and they knew that the reduction of sunlight would be balanced by heating by absorption of sunlight by the black smoke. It took Turco et al. (1983) and Aleksandrov and Stenchikov (1983), soon followed by Robock (1984) and Covey et al. (1984) to calculate the surface temperature and explain it as nuclear winter. But of course, they were inspired by Crutzen and Birks. Crutzen and Birks (1982) write about a lifetime for the smoke of weeks and maybe months, and that the smoke would be removed by rain and dry deposition (“Alternatively these reactions begin to occur after*

*an appreciable fraction of the aerosol loading of the atmosphere has diminished because of removal of the particulate matter by rain or dry deposition.”). In fact, they say, “Our model does not predict significant stratospheric ozone depletion” for the scenario they studied, but they did write, “Finally, we may point out that there is a possibility that even a nuclear war according to Scenario I, in which most NO<sub>x</sub> is deposited in the troposphere, may cause ozone depletions in the stratosphere, if the hot fires in the oil and gas production regions become so powerful that the fire plumes penetrate into the stratosphere. Another means of upward transport may occur when the heavy, dark aerosol layer, initially located in the troposphere, is heated by solar radiation and starts to set up convection and wind systems which will transport an appreciable fraction of the fire effluents into the stratosphere. These speculative thoughts may be pursued further with currently available general circulation models of the atmosphere.” Crutzen and Birks (1982) make no conclusions about the impacts on climate on nuclear war, and did not think it likely. They only speculate about it and say the answers must await further work. They write, “It may be possible to test the impact of nuclear war on climate with this [referring to Jim Hansen’s recent work] and similar models when these are supplied with reasonable estimates of the trace gas and aerosol composition of the earth’s atmosphere. Whether the induced perturbation in the climate system could lead to longer lasting climatic changes will, however, be difficult to predict. In fact, it may seem unlikely that it will take place. The Krakatoa volcanic eruption of 1883 injected quantities of aerosol into the atmosphere comparable to those which would be caused by a nuclear war, and global mean temperatures were affected for only a few years (1). Still, we must be cautious with a prediction as the physical characteristics of the aerosol produced by volcanos and fires are different, and much is still unknown about the fundamentals of climatic changes. For instance, we may ask questions such as whether the earth’s albedo would be substantially altered after a nuclear war and thus affect the radiation balance or whether the deposition of soot aerosol on arctic snow and ice and on the glaciers of the Northern Hemisphere might not lead to such heavy snow and ice melting as to cause an irreversible change in one or more important climatic parameters”.*

We agree with these points and now say in the paper:

Abstract: “His work on smoke from fires a after nuclear war inspired new research on a concept now known as “nuclear winter”.”

Body of the paper:

“Moreover, he was involved in the first studies on the global effects of a thick smoke layer in the atmosphere produced by fires caused by a possible nuclear war . . .”

and

“Paul’s work on smoke from fires after a possible nuclear war and the absorption of sunlight by the smoke (Crutzen and Birks, 1982; Birks and Crutzen, 1983) introduced the concept that the use of nuclear weapons would have global impacts that go much beyond the more obvious direct effects. This work inspired substantial research activity – Turco et al. (1983) and Aleksandrov and Stenchikov (1983), soon followed by Robock (1984) and Covey et al. (1984)

calculated the surface temperature response to fires after a nuclear war and introduced the term “nuclear winter (see also Robock et al., 2023)”.

*Paul did reopen the debate about geoengineering (now known as “climate intervention”), but only one particular kind. He only discussed solar radiation modification, and not carbon dioxide removal. In fact, he only discussed one proposed scheme, “albedo enhancement by stratospheric sulfur injections”.*

We agree and have reformulated the respective papers of the paper.

Abstract:

“He also initiated the reopening of the debate on “geoengineering” – a concept now referred to as “climate intervention”.

We now say in the paper:

“... Paul has also sparked a new debate by breaking the taboo regarding a possible cooling of the climate by increasing the earth’s albedo through stratospheric sulphur injections (Crutzen, 2006).”

Paul also initiated a new discussion on the question of “geoengineering” (now known as “climate intervention”) by discussing the role of albedo enhancements caused by stratospheric sulphur injections (Crutzen, 2006).”

and

“These two papers are on the global consequences of a possible nuclear exchange (nuclear winter, Robock et al., 2023) and on climate intervention (Visioni et al., 2023).”

## “Discussion Papers”

*Lines 149-150: You should also mention the problem that open access to ACP preprints creates. They are assigned a DOI, and I have seen many submitted and even published papers that reference Discussions papers. Sometimes these are rejected papers that should never be referenced, and all the others are not peer-reviewed and have issues that were resolved in the final versions. Just saying how wonderful ACP is while ignoring this problem is disingenuous.*

We agree with Alan Robock that peer reviewed published papers should not be confused with unrefereed preprints. However, this confusion should have been prevented by the two names “Atmospheric Chemistry and Physics” (ACP, for peer reviewed journal articles) and “Atmospheric Chemistry and Physics Discussions” (ACPD, for preprints under discussion). In any case, these two types of publications are different. We also admit, that when the concept of public discussion of submitted manuscripts was introduced, there was initially some confusion in the community about the status of discussion papers (likely because the idea was new at that time).

However, we think that referring to preprints under consideration at ACP is very similar to referring to manuscripts/preprints on arXiv.org and other preprint servers. The only difference being that ACPD papers were under review for the journal, while preprints on arXiv may or may not be under review in a journal. In particular the status of submitted papers/preprints has been further clarified since early 2023 by retiring ACPD and introducing the preprint server EGU sphere for submitted papers for journals like ACP. EGU sphere is

a repository for both standalone preprints (much like arXiv.org) and preprints that are under review in ACP. Retiring ACPD was a step taken to partly address concerns like the one expressed in this comment. In particular, the EGU<sub>sphere</sub> doi makes the preprint status clearer, while the doi also ensures that people’s free speech and intellectual ideas are protected and properly archived – a paper on EGU<sub>sphere</sub> remains a preprint.

Further, the system of manuscript reviewing and editorial decisions at ACP was evaluated independently (Bornmann et al., 2010, 2011). There will also be a paper in this special issue (Ervens et al., 2023) where the publishing process in ACP is discussed in much more detail than appropriate and possible here.

Nonetheless, in order to mention the problem that open access to ACP preprints possibly creates, we have introduced the following text in the paper: “Initially, when the concept of public peer-review and a public discussion of submitted manuscripts was introduced, there was some confusion in the community about the status of discussion papers. Since early 2023, to clarify the status of submitted papers (which are not peer-reviewed), the term ‘Atmospheric Chemistry and Physics Discussions’ (ACPD) is no longer used and papers submitted to ACP appear on the preprint server EGU<sub>sphere</sub> (after an initial screening).”

## References

- Aleksandrov, V. V. and Stenchikov, G. L.: On the modeling of the climatic consequences of the nuclear war, in: Proc. Applied Math., p. 21, Computing Centre, USSR Academy of Sciences, Moscow, 1983.
- Birks, J. W. and Crutzen, P. J.: Atmospheric effects of a nuclear war, Chemistry in Britain, pp. 927–930, 1983.
- Bornmann, L., Marx, W., Schier, H., Thor, A., and Daniel, H.-D.: From black box to white box at open access journals: predictive validity of manuscript reviewing and editorial decisions at *Atmospheric Chemistry and Physics*, Research Evaluation, 19, 105–118, <https://doi.org/10.3152/095820210X510089>, 2010.
- Bornmann, L., Schier, H., Marx, W., and Daniel, H.-D.: Is Interactive Open Access Publishing Able to Identify High-Impact Submissions? A Study on the Predictive Validity of *Atmospheric Chemistry and Physics* by Using Percentile Rank Classes, Journal of the American Society for Information Science and Technology, pp. 62–71, <https://doi.org/10.1002/asi>, 2011.
- Covey, C., Thompson, S., and Schneider, S. H.: Global atmospheric effects of massive smoke injections from a nuclear war: Results from general circulation model simulations, Nature, 308, 21–25, 1984.

- Crutzen, P. J.: Albedo enhancements by stratospheric sulfur injections: a contribution to resolve a policy dilemma? An Editorial Essay, *Clim. Change*, 77, 211–219, 2006.
- Crutzen, P. J. and Birks, J. W.: The atmosphere after a nuclear war: Twilight at Noon., *Ambio*, 2&3, 114–125, 1982.
- Ervens, B., Pöschl, U., and Carslaw, K.: Interactive open access publishing with multi-stage open peer review in the European Geosciences Union (EGU): more than two decades of successful transparent, self-regulating, and community-based scientific exchange and quality assurance, *Atmos. Chem. Phys.*, in preparation, 2023.
- Robock, A.: Snow and ice feedbacks prolong effects of nuclear winter, *Nature*, 310, 667–670, 1984.
- Robock, A., Xia, L., Harrison, C. S., Coupe, J., Toon, O. B., and Bardeen, C. G.: Opinion: How fear of nuclear winter has helped save the world, so far, *Atmos. Chem. Phys.*, 23, 6691–6701, <https://doi.org/10.5194/acp-23-6691-2023>, 2023.
- Turco, R. P., Toon, O. B., Ackerman, T. P., Pollack, J. B., and Sagan, C.: Nuclear winter: Global consequences of multiple nuclear explosions, *Science*, 222, 1283–1292, <https://doi.org/10.1126/science.222.4630.1283>, 1983.
- Visioni, D., Kravitz, B., Robock, A., Tilmes, S., Haywood, J., Boucher, O., Lawrence, M., Irvine, P., Niemeier, U., Xia, L., Chiodo, G., Lennard, C., Watanabe, S., Moore, J. C., and Muri, H.: Opinion: The scientific and community-building roles of the Geoengineering Model Intercomparison Project (GeoMIP) – past, present, and future, *Atmos. Chem. Phys.*, 23, 5149–5176, <https://doi.org/10.5194/acp-23-5149-2023>, 2023.
